# Supplementary material for: MiR-665 aggravates heart failure via suppressing CD34-mediated coronary microvessel angiogenesis
Source: PubMed Central journal article supplement (PMC6188485; doi:10.18632/aging.101562), 2018-09-21
Supplement: aging-10-101562-s002.pdf [file aging-10-101562-s002.pdf]

**SUPPLEMENTARY TABLES**

**Supplementary Table 1. List of PCR primers.**

|                 | <b>Forward</b>                                                                                                                                              | <b>Reverse</b>                  |
|-----------------|-------------------------------------------------------------------------------------------------------------------------------------------------------------|---------------------------------|
| Hsa-AKT3        | 5'-AGTGTGTGCCCACTGAGGA-3'                                                                                                                                   | 5'-GTGCTGTAGGAAGCTCATCTC-3'     |
| Hsa-VEGFA       | 5'-TGCATGTGCAGACTCCTTTC-3'                                                                                                                                  | 5'-CCAACAAAACAATGGAGCCT-3'      |
| Hsa-IGF1        | 5'-TGCATGTGCAGACTCCTTTC-3'                                                                                                                                  | 5'-GAGGACAAGGCTGAGGTCTG-3'      |
| Hsa-CD34        | 5'-TGCATGTGCAGACTCCTTTC-3'                                                                                                                                  | 5'-AGCTTGATCAAAGTAGGCAGGACCA-3' |
| Hsa-CD34-3' UTR | 5'-AGGGGCCTCAGCCTCCTGGTTTCAAGA-3'                                                                                                                           | 5'-AGCTTGATCAAAGTAGGCAGGACCA-3' |
| miR-665         | 5'-AGGGGCCTCAGCCTCCTGGTTTCAAGAGAACCAGGAGGCTG AGGCCCT-3'                                                                                                     |                                 |
| miR-665 TUD     | 5'-<br>GGATCCGACGGCGCTAGGATCATCAACAGGGGCCTCAATCTGCCTCCTGGTCAAGTATTCTGGTCA<br>CAGAATACAACAGGGGCCTCAATCTGCCTCCTGGTCAAGATGATCCTAGCGCCGTCTTTTTCCGC<br>GGCCGC-3' |                                 |

**Supplementary Table 2. Clinical characteristics of patients with heart failure.**

| <b>Patient</b> | <b>Gender</b> | <b>Age (years)</b> | <b>Diagnosis</b> | <b>LVEF (%)</b> |
|----------------|---------------|--------------------|------------------|-----------------|
| 1              | Male          | 40                 | DCM              | 28              |
| 2              | Male          | 47                 | DCM              | 29              |
| 3              | Male          | 58                 | DCM              | 30              |
| 4              | Male          | 61                 | DCM              | 31              |
| 5              | Male          | 66                 | DCM              | 22              |

DCM, dilated cardiomyopathy
