# Supplementary material for: MiR-665 aggravates heart failure via suppressing CD34-mediated coronary microvessel angiogenesis
Source: publisher site journal article supplement (doi:10.18632/aging.101562), 2018-09-21
Supplement: Supplementary file [file aging-v10i9-101562-supplementary-material-SD1.pdf]

SUPPLEMENTARY FIGURES

A.

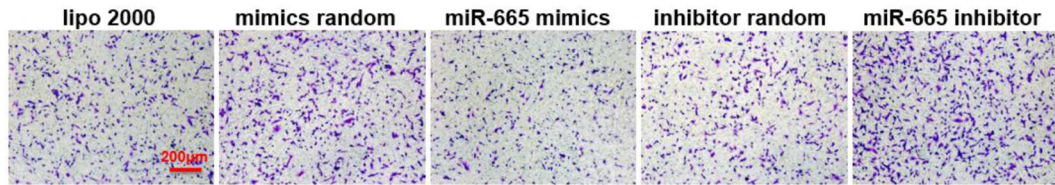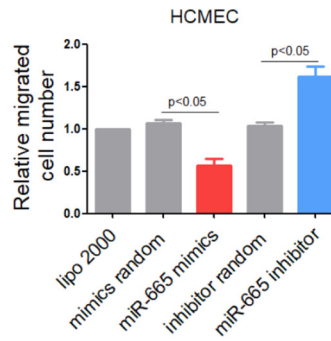

B.

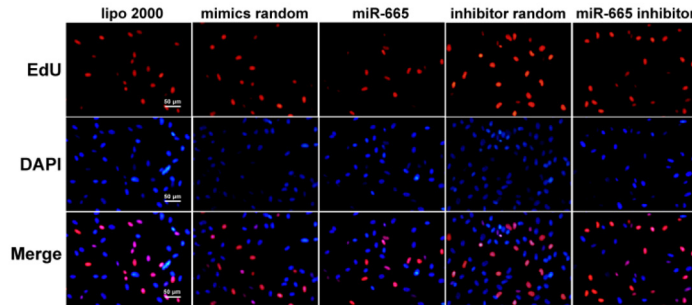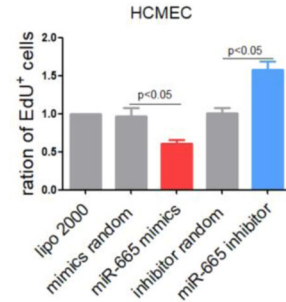

**Supplementary Figure 1. MiR-665 impairs endothelium function in vitro.** (A) Migration evaluated by transwell experiment in HCMEC cells. (B) Proliferation detected by EdU incorporation assays in HCMEC cells.

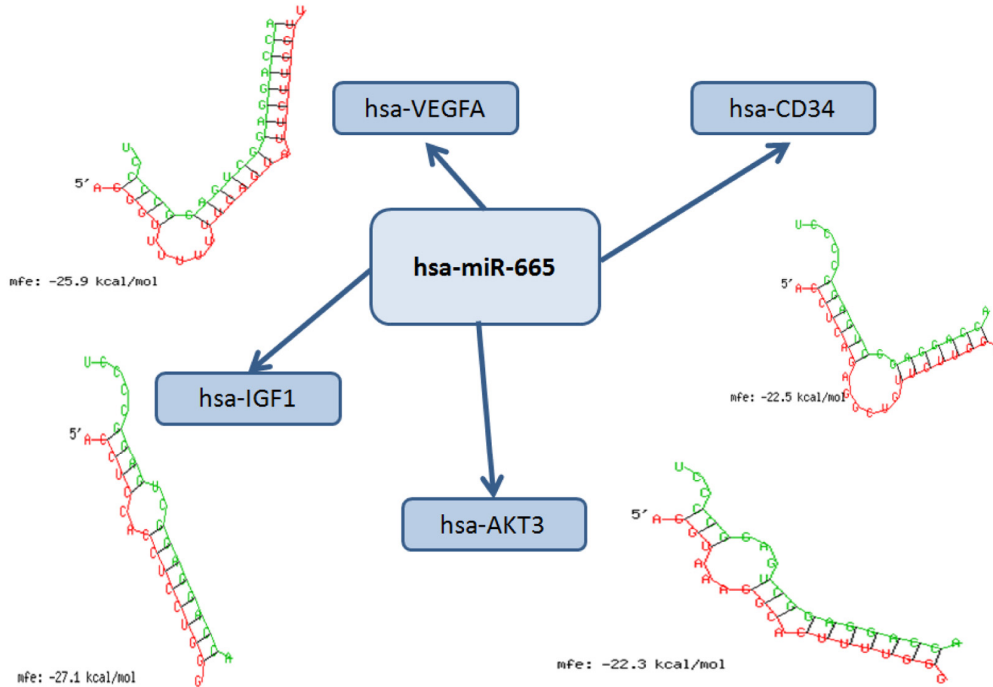

**Supplementary Figure 2. Predicted targets of miR-665.** The Bielefeld Bioinformatics Server was used to search for mRNA that could interact with miR-665. CD34, IGF1, VEGFA and AKT3 were suggested as targets of miR-665.

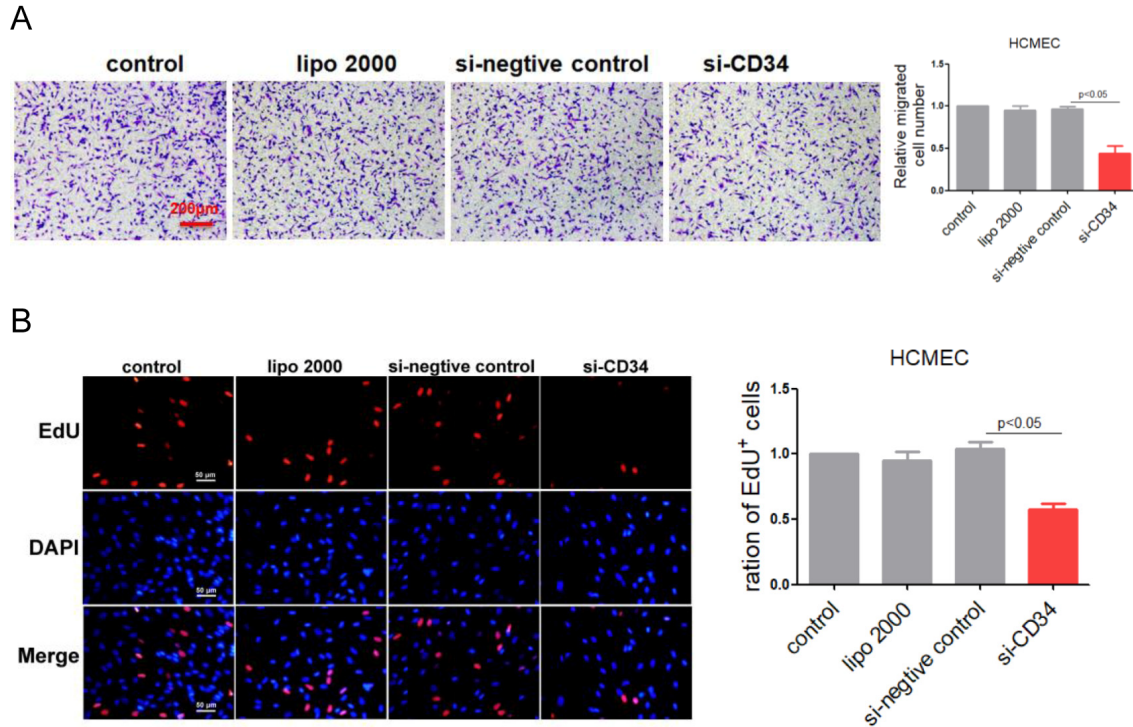

**Supplementary Figure 3. Down-regulation of CD34 impairs endothelium function in vitro.** (A) Migration valuated by transwell experiment in HCMEC cells. (B) Proliferation detected by EdU incorporation assays in HCMEC cells.

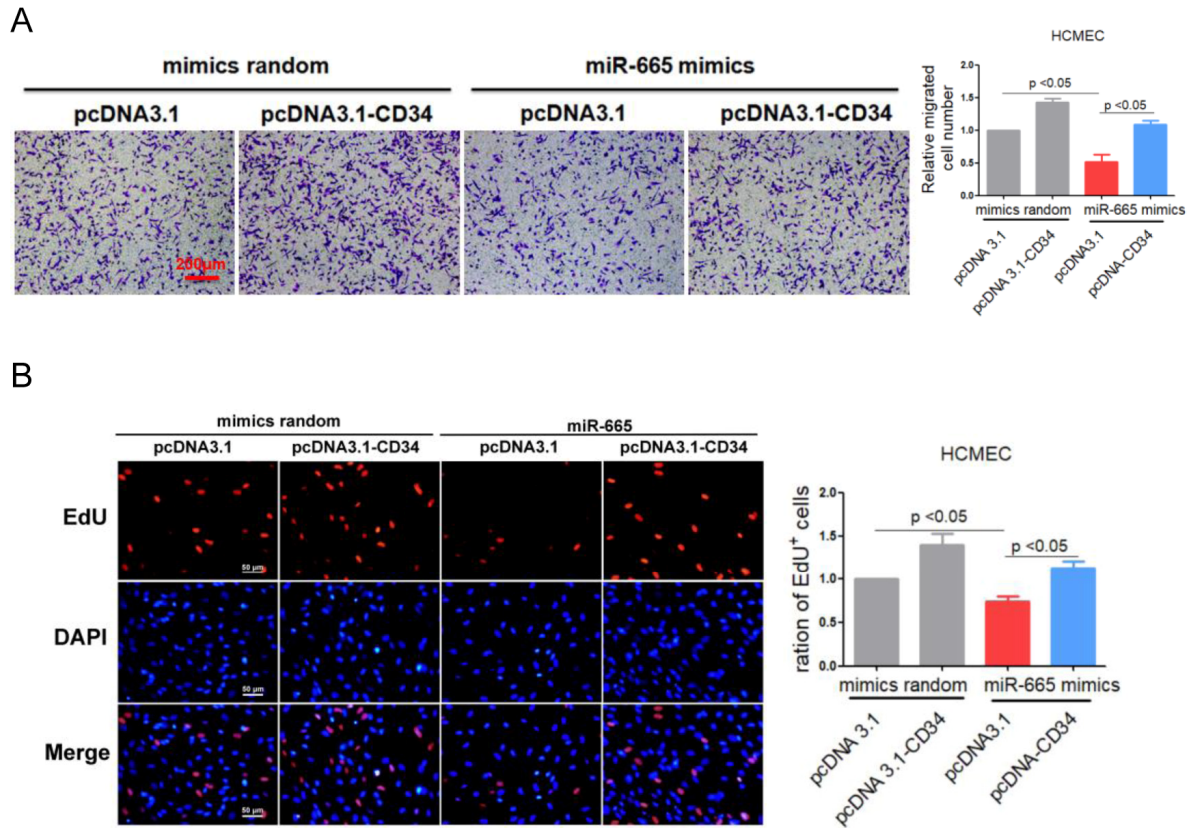

**Supplementary Figure 4. Re-expression of CD34 reverses miR-665 induced endothelium dysfunction in vitro.** (A) Migration evaluated by transwell experiment in HCMEC cells. (B) Proliferation detected by EdU incorporation assays in HCMEC cells.

A

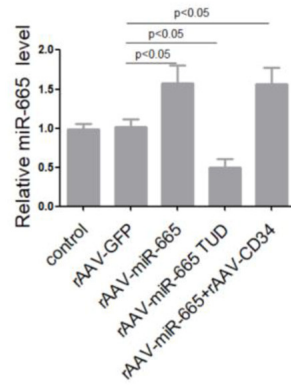

B

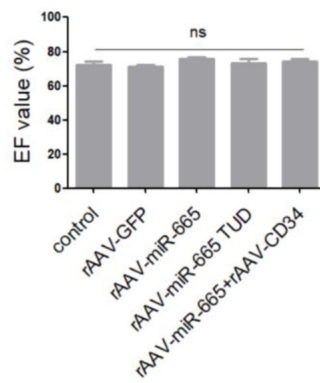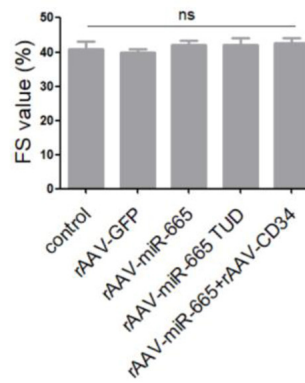

C

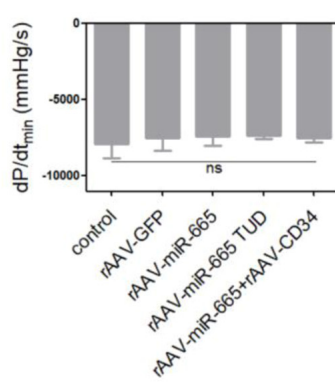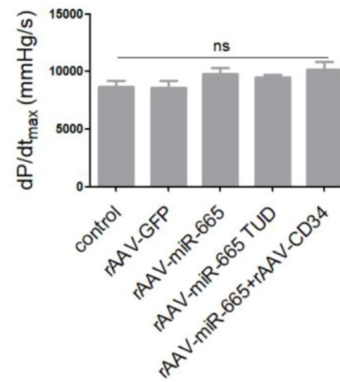

**Supplementary Figure 5. MiR-665 does not affect heart function under normal conditions. (A)** Relative cardiac expression of miR-665 detected by real-time PCR. **(B)** Echocardiographic detection in treated mice. **(C)** Hemodynamic analysis measured by Millar cardiac catheter system in treated mice.
